# Supplementary material for: Patient-derived non-small cell lung cancer xenograft mirrors complex tumor heterogeneity
Source: PubMed Central journal article supplement (PMC7877179; doi:10.20892/j.issn.2095-3941.2020.0012), 2021-02-15
Supplement: cbm-18-184-s001.pdf [file cbm-18-184-s001.pdf]

## Supplementary materials

**Table S1** Clinical and pathological characteristics of 75 lung cancer patients and their tumors

| Patient ID | Age (years)/<br>gender | Smoking<br>history (years) | Differentiation | TNM stage | Site | Histological<br>cell type | Tumor<br>size (cm <sup>3</sup> ) | Metastasis |
|------------|------------------------|----------------------------|-----------------|-----------|------|---------------------------|----------------------------------|------------|
| LC-00158   | 44/F                   | N                          | Moderately      | IA        | LUL  | ADC                       | 1.86                             | N          |
| LC-00368   | 70/M                   | 40                         | Poorly          | IIB       | RLL  | SCC                       | 18.85                            | N          |
| LC-00536   | 60/F                   | N                          | Poorly          | IIIA      | RML  | ADC                       | 1.00                             | Y          |
| LC-00666   | 71/F                   | N                          | Moderately      | IB        | LLL  | SCC                       | 31.41                            | N          |
| LC-00592   | 62/M                   | 40                         | Poorly          | IIIB      | RLL  | ADC                       | 126                              | Y          |
| LC-00234   | 72/M                   | 50                         | Poorly          | IIB       | RLL  | SCC                       | 81.73                            | N          |
| LC-00576   | 66/M                   | 45                         | Poorly          | IA        | RLL  | ADC+SCC                   | 2.25                             | N          |
| LC-00088   | 52/M                   | 20                         | Poorly          | IB        | RUL  | SCC                       | 25.13                            | Y          |
| LC-00453   | 61/F                   | N                          | Poorly          | IIIA      | RLL  | ADC                       | 13.50                            | Y          |
| LC-00374   | 76/M                   | 30                         | Moderately      | IB        | RLL  | SCC                       | 14.14                            | N          |
| LC-00178   | 73/M                   | 30                         | Moderately      | IB        | RML  | ADC                       | 13.50                            | N          |
| LC-00144   | 63/M                   | 7                          | Moderately      | IB        | RLL  | ADC                       | 16.49                            | N          |
| LC-00507   | 73/M                   | 50                         | Poorly          | IB        | RUL  | SCC                       |                                  | N          |
| LC-00083   | 62/M                   | N                          | Poorly          | IIIB      | RML  | SCC                       | 108.00                           | Y          |
| LC-00022   | 60/F                   | N                          | Moderately      | IB        | LUL  | ADC                       | 5.24                             | N          |
| LC-00001   | 59/M                   | 45                         | Moderately      | IIA       | LUL  | SCC                       | 108.00                           | N          |
| LC-00827   | 70/M                   | 50                         | Poorly          | IIA       | RLL  | SCC                       | 40.00                            | Y          |
| LC-00877   | 58/M                   | 35                         | Poorly          | IB        | LUL  | SCC                       | 32.00                            | N          |
| LC-00781   | 61/M                   | 40                         | Poorly          | IIA       | RLL  | SCC                       | 12.76                            | Y          |
| LC-00343   | 59/M                   | 40                         | Poorly          | IIIA      | LUL  | SCC                       | 12.76                            | Y          |
| LC-00095   | 74/M                   | 50                         | Poorly          | IB        | RLL  | SCC                       | 0.60                             | N          |
| LC-00304   | 55/M                   | 30                         | Poorly          | IIIA      | RLL  | SCC                       | 144                              | Y          |
| LC-00702   | 62/M                   | 45                         |                 | IB        | LLL  | SCC                       | 6.00                             | N          |
| LC-00894   | 67/F                   | N                          |                 | IA        | RLL  | ADC                       | 4.19                             | N          |
| LC-00010   | 55/F                   | N                          |                 | IB        | RUL  | ADC                       | 18.00                            | N          |
| LC-00829   | 53/F                   | N                          |                 | IA        | LUL  | ADC                       | 4.19                             | N          |
| LC-00813   | 66/M                   | 45                         | Poorly          | IIIA      | RUL  | ADC                       | 65.45                            | Y          |
| LC-00444   | 43/F                   | N                          |                 | IB        | LLL  | SCC                       | 13.74                            | Y          |
| LC-00053   | 61/F                   | N                          |                 |           | LUL  | ADC                       | 7.85                             |            |
| LC-00700   | 62/M                   | 30                         |                 |           | RLL  | SCC                       |                                  |            |
| LC-00831   | 59/F                   | N                          | Moderately      | IB        | RLL  | ADC                       | 7.85                             | N          |
| LC-00195   | 51/M                   | 30                         | Poorly          | IIIA      | LLL  | ADC                       | 144.00                           | Y          |

Table S1 Continued

| Patient ID | Age (years)/<br>gender | Smoking<br>history (years) | Differentiation | TNM stage | Site | Histological<br>cell type | Tumor<br>size (cm <sup>3</sup> ) | Metastasis |
|------------|------------------------|----------------------------|-----------------|-----------|------|---------------------------|----------------------------------|------------|
| LC-00167   | 52/M                   | 30                         | Poorly          | IIB       | RUL  | ADC                       | 16.89                            | Y          |
| LC-00576   | 62/F                   | N                          | Poorly          | IA        | LUL  | ADC                       | 15.08                            | N          |
| LC-00615   | 55/F                   | N                          |                 | IA        | LUL  | ADC                       | 0.13                             | N          |
| LC-00200   | 52/M                   | 20                         | Well            | IA        | LUL  | ADC                       | 0.52                             | N          |
| LC-00193   | 71/F                   | 0                          | Poorly          | IB        | RUL  | ADC                       | 5.78                             | N          |
| LC-00886   | 74/F                   | N                          | Poorly          | IIA       | RLL  | ADC                       | 25.13                            | Y          |
| LC-00526   | 62/F                   | N                          | Poorly          | IV        | LLL  | ADC                       | 18.85                            | Y          |
| LC-00080   | 51/F                   | N                          |                 |           | RUL  | ADC                       |                                  |            |
| LC-00349   | 42/M                   | 30                         | Well            | IIIA      | RML  | ADC                       | 196.00                           | N          |
| LC-00100   | 67/M                   | 30                         |                 | IA        | LLL  | SCC                       | 6.78                             | N          |
| LC-00338   | 64/M                   | 45                         | Poorly          | IA        | RUL  | ADC                       | 1.00                             | N          |
| LC-00520   | 37/M                   | N                          | Poorly          | IIIA      | LUL  | ADC                       | 3.14                             | Y          |
| LC-00065   | 52/M                   | 30                         | Poorly          | IB        | LUL  | SCC                       | 21.99                            | N          |
| LC-00516   | 70/F                   | N                          | Poorly          | IIA       | LUL  | ADC                       | 1.05                             | Y          |
| LC-00157   | 51/F                   | N                          | Moderately      | IB        | RLL  | ADC                       | 13.04                            | N          |
| LC-00327   | 56/M                   | 40                         | Poorly          | IIA       | RLL  | ADC                       |                                  | Y          |
| LC-00111   | 88/M                   | N                          | Moderately      | IB        | RUL  | SCC                       | 6.00                             | N          |
| LC-00798   | 60/F                   | N                          | Moderately      | IB        | RML  | ADC                       | 18.85                            | N          |
| LC-00441   | 46/F                   | N                          | Moderately      | IA        | RLL  | ADC                       | 2.60                             | N          |
| LC-00442   | 44/F                   | N                          | Poorly          | IA        | RUL  | ADC                       | 7.81                             | N          |
| LC-00921   | 79/F                   | N                          | Poorly          | IB        | LUL  | SCC                       | 18.00                            | N          |
| LC-00428   | 52/M                   | N                          | Moderately      | IB        | RUL  | ADC                       | 6.05                             | N          |
| LC-00339   | 70/M                   | 40                         | Moderately      | IIB       | RLL  | ADC                       | 9.42                             | Y          |
| LC-00112   | 59/M                   | 30                         | Poorly          | IB        | RML  | ADC                       | 3.61                             | N          |
| LC-00597   | 71/M                   | 50                         | Poorly          | IB        | RLL  | SCC                       | 9.42                             | N          |
| LC-00335   | 75/M                   | 30                         | Poorly          | IIB       | LLL  | ADC                       | 31.41                            | Y          |
| LC-00185   | 66/F                   | N                          | Moderately      | IIA       | RUL  | ADC                       | 1.05                             | Y          |
| LC-00333   | 71/F                   | N                          | Moderately      | IA        | LUL  | ADC                       | 1.69                             | N          |
| LC-00198   | 56/M                   | 40                         |                 | IA        | RUL  | ADC                       | 0.29                             | N          |
| LC-00223   | 59/M                   | 2                          | Moderately      | IA        | RLL  | ADC                       | 4.54                             | N          |
| LC-00844   | 47/M                   | 18                         | Moderately      | IA        | LUL  | ADC                       | 0.1                              | N          |
| LC-00910   | 46/M                   | 10                         |                 | IA        | LUL  | LCNEC                     | 0.03                             | N          |
| LC-00213   | 44/F                   | N                          | Poorly          | IA        | RLL  | ADC                       | 5.6                              | N          |
| LC-00095   | 52/M                   | N                          | Moderately      | IA        | RUL  | ADC                       | 0.75                             | N          |

**Table S1** Continued

| Patient ID | Age (years)/gender | Smoking history (years) | Differentiation | TNM stage | Site | Histological cell type | Tumor size (cm <sup>3</sup> ) | Metastasis |
|------------|--------------------|-------------------------|-----------------|-----------|------|------------------------|-------------------------------|------------|
| LC-00192   | 55/F               | N                       | Poorly          | IA        | LUL  | ADC                    | 0.31                          | N          |
| LC-00214   | 70/M               | 50                      | Poorly          | IA        | LLL  | ADC                    | 0.47                          | N          |
| LC-00125   | 53/F               | N                       | Moderately      | IA        | RML  | ADC                    | 2.25                          | N          |
| LC-00649   | 76/F               | N                       | Moderately      | IA        | LUL  | ADC                    | 1.14                          | N          |
| LC-00294   | 52/M               | 12                      |                 | IA        | RUL  | ADC                    | 0.7                           | N          |
| LC-00820   | 39/M               | 15                      |                 | IA        | RUL  | ADC                    | 0.03                          | N          |
| LC-00879   | 59/M               | 10                      |                 | IA        | RUL  | ADC                    | 1.57                          | N          |
| LC-00078   | 70/F               | N                       | Moderately      | IA        | RUL  | ADC                    | 1.44                          | N          |
| LC-00621   | 60/F               | N                       | Moderately      | IA        | LLL  | ADC                    | 2.82                          | N          |

TNM, tumor node metastasis; ADC, adenocarcinoma; SCC, squamous cell carcinoma, LCNEC, large-cell neuroendocrine carcinoma; LUL, left upper lobe; RLL, right lower lobe; RML, right middle lobe; LLL, left lower lobe; RUL, right upper lobe. The blank space indicates no information.

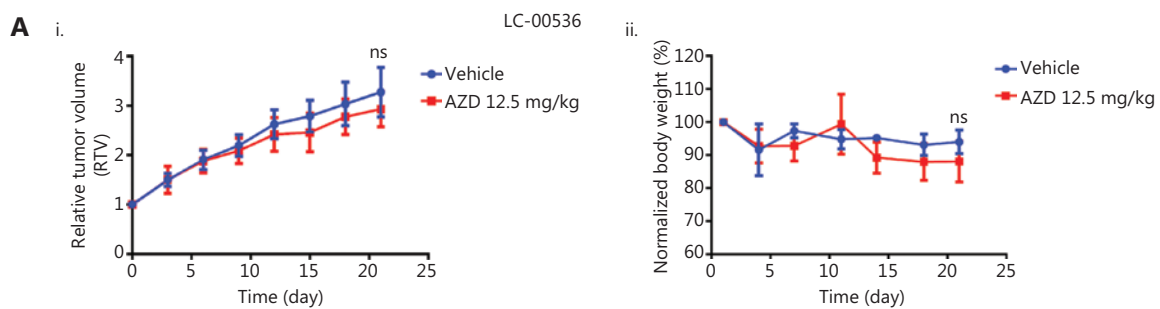

**Figure S1** Efficacy validation of an investigational new drug. Changes in Ai, relative tumor volume and Aii, body weight after patient-derived xenograph mice of LC-00536 were treated with AZD4547 for 21 days.

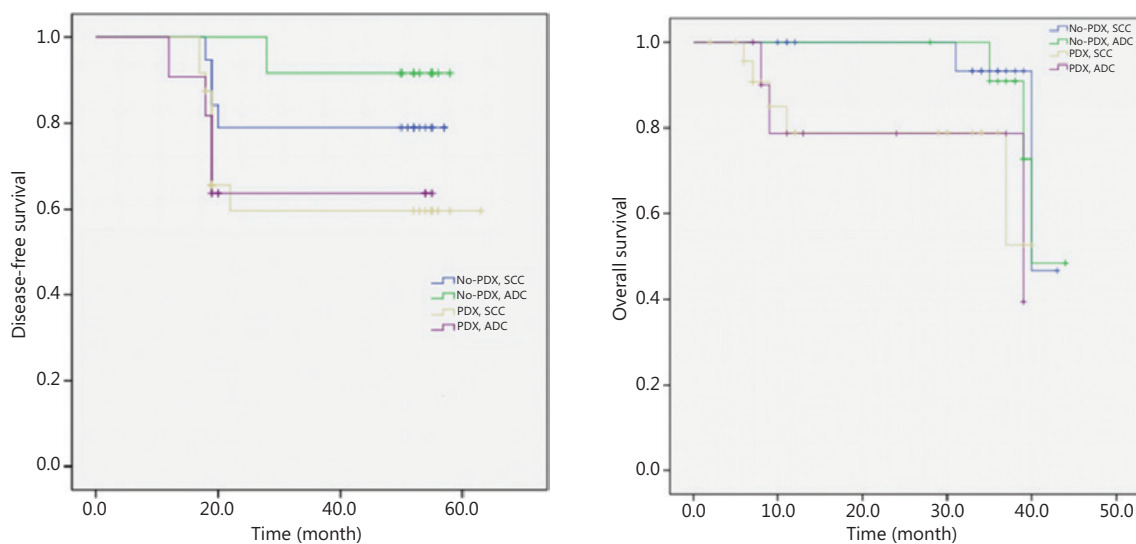

**Figure S2** Disease-free survival and overall survival of non-small cell lung cancer patients according to the engraftment status and histological cell type of their patient-derived tumor xenografts.
